# Supplementary material for: Novel oncogene 5MP1 reprograms c-Myc translation initiation to drive malignant phenotypes in colorectal cancer
Source: PubMed Central journal article supplement (PMC6606960; doi:10.1016/j.ebiom.2019.05.058), 2019-06-04
Supplement: mmc2.pdf [file mmc2.pdf]

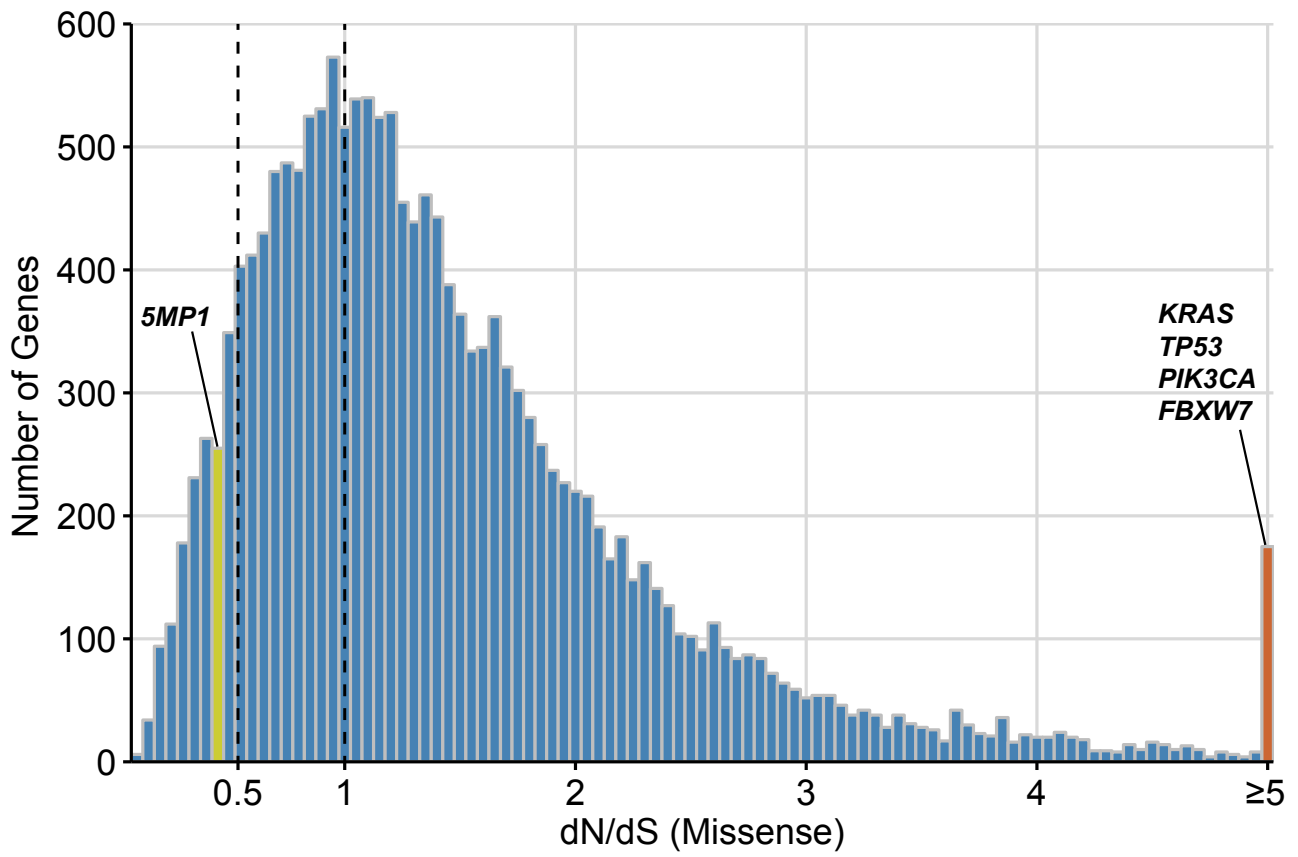

**Figure S2. Distributions of dN/dS ratios in TCGA CRC dataset. Related to Figure1.** A histogram of dN/dS ratios per gene for missense mutations estimated by dNdScv in TCGA CRC dataset (N=561). *5MP1* and known driver genes in CRC are indicated.
