# Supplementary material for: Novel oncogene 5MP1 reprograms c-Myc translation initiation to drive malignant phenotypes in colorectal cancer
Source: PubMed Central journal article supplement (PMC6606960; doi:10.1016/j.ebiom.2019.05.058), 2019-06-04
Supplement: mmc3.pdf [file mmc3.pdf]

**a**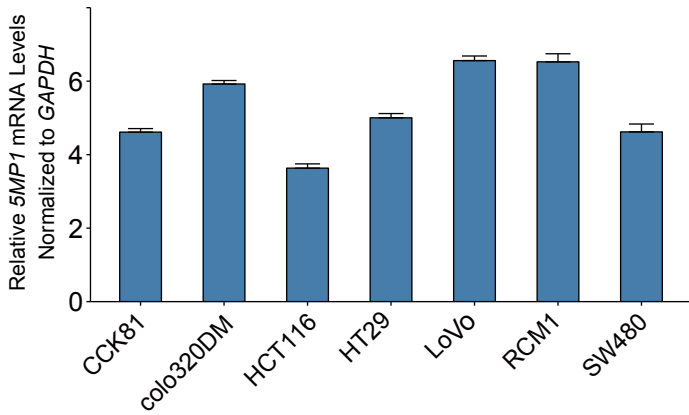**b**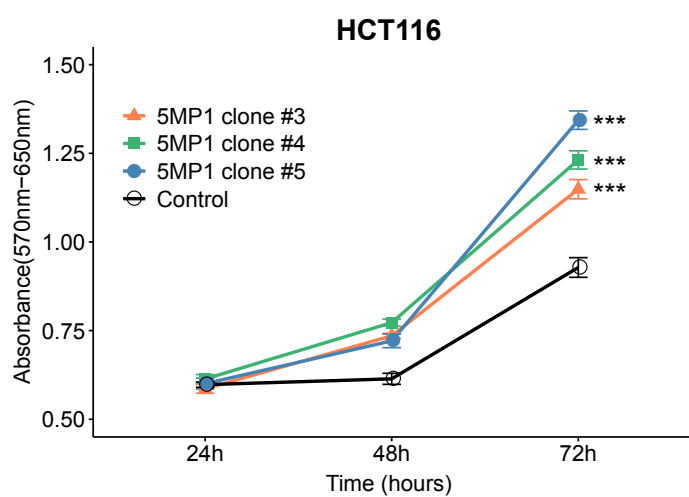**c**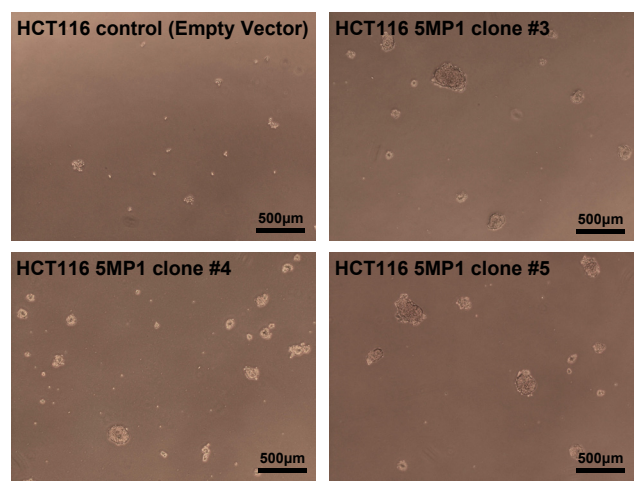**d**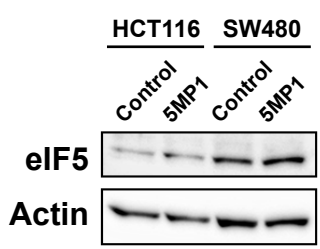**e**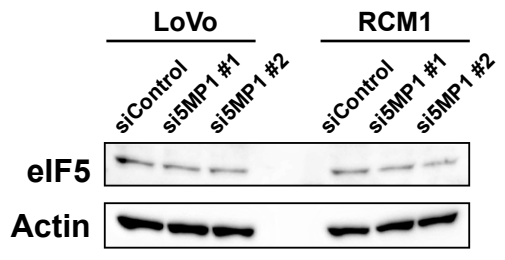

**Figure S3. Expression levels of 5MP1 and eIF5 and the effect of 5MP1 overexpression in CRC cell lines. Related to Figure2.** (a) Relative 5MP1 mRNA expression levels measured by qRT-PCR in CRC cell lines, normalized to GAPDH mRNA expression. Data represent the mean  $\pm$  SD of three independent experiments. (b) Proliferation curves of 5MP1-overexpressed HCT116 cells and control cells measured by MTT assays. (\*\*\*)  $p < 0.001$ ; Dunnett-test was used to adjust for multiple comparisons. Data represent mean  $\pm$  SEM ( $n = 9$  for each group). (c) Representative images of oncospheres derived from 5MP1-overexpressed HCT116 cells and control cells. (d) Western blot of eIF5 in control cells and 5MP1-overexpressed cells. Actin was used as the loading control (e) Western blot of eIF5 in control cells and siRNA-mediated 5MP1-knockdown cells. Actin was used as the loading control.
