# Supplementary material for: Novel oncogene 5MP1 reprograms c-Myc translation initiation to drive malignant phenotypes in colorectal cancer
Source: PubMed Central journal article supplement (PMC6606960; doi:10.1016/j.ebiom.2019.05.058), 2019-06-04
Supplement: mmc4.pdf [file mmc4.pdf]

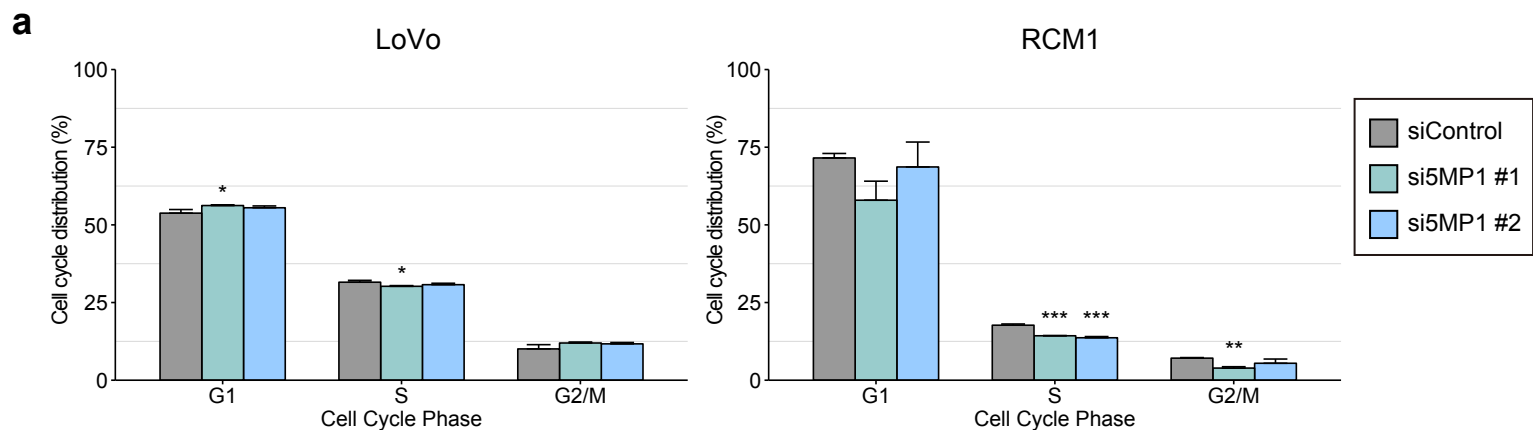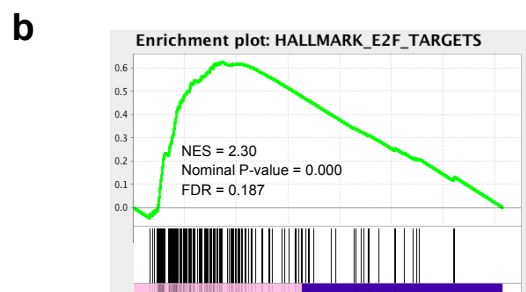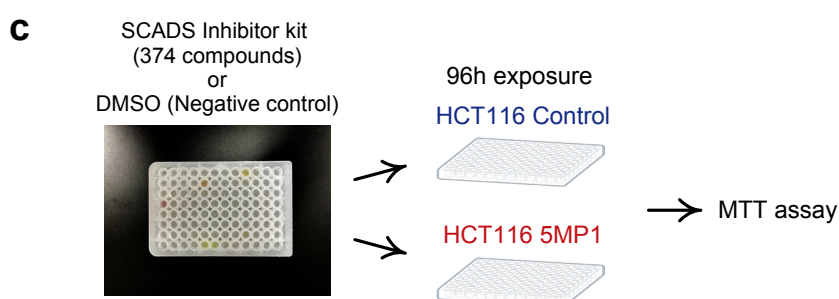

**d**

|        | Targets                                                      | Compound                    | Cell Viability (Mean OD 570nm-650nm) |       |
|--------|--------------------------------------------------------------|-----------------------------|--------------------------------------|-------|
|        |                                                              |                             | Control                              | 5MP1  |
| CDK    | CDK2/CyclinA, CDK2/CyclinE, CDC2/CyclinB, CDK5/p35, MAPK     | Olomoucine                  | 1.234                                | 0.949 |
|        | CDK2/CyclinA, CDK2/CyclinE, CDC2/CyclinB, CDK5/p35           | Purvalanol A                | 1.334                                | 0.985 |
|        | CDK1/CyclinB, CDK2/CyclinA, CDK2/CyclinE                     | Kenpaullone                 | 1.414                                | 1.040 |
|        | CDK1/CyclinB, CDK2/CyclinA, VEGF-R2, GSK3                    | CDK1/2 Inhibitor III        | 0.443                                | 0.282 |
|        | CDK1/CyclinB, CDK5/p53, GSK3                                 | Indirubin-3'-monoxime       | 1.285                                | 1.096 |
|        | CDK1/CyclinB, CDK2/CyclinA, CDK5/p25, GSK3                   | GSK-3 inhibitor IX          | 1.418                                | 0.961 |
| Aurora | Aurora-A, Aurora-B, CDK1/CyclinB, CDK2/CyclinA, CDK2/CyclinE | JNJ-7706621                 | 1.301                                | 0.927 |
|        | Aurora-A                                                     | ENMD-2076                   | 1.160                                | 0.887 |
|        | Aurora-A                                                     | MLN8237                     | 1.135                                | 0.850 |
|        | Aurora-A                                                     | Aurora kinase inhibitor III | 1.269                                | 0.982 |

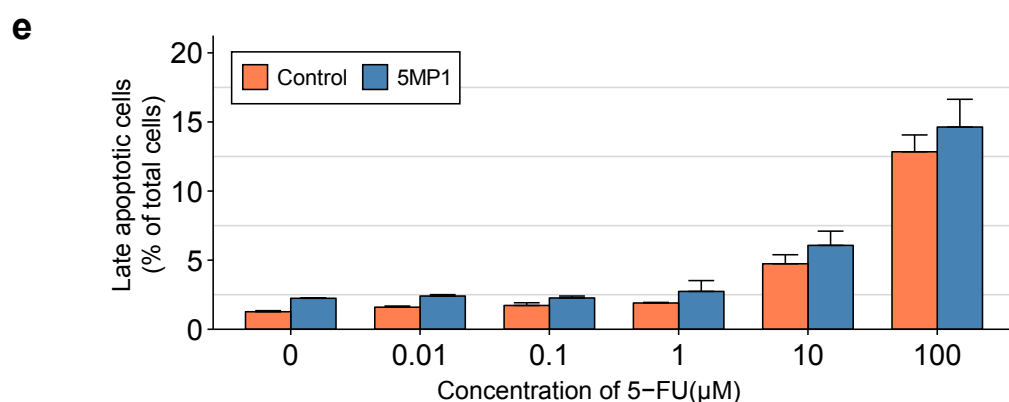

**Figure S4. 5MP1 induces c-Myc-mediated cell cycle progression. Related to Figure 3.** (a) Cell cycle assay of siRNA-mediated 5MP1-knockdown cells. Bar graphs represent the cell distribution in each cell cycle phase. (b) GSEA with a significant enrichment score showing a cell-cycle-related geneset that are positively correlated with 5MP1 expression in 5MP1-overexpressed cells. NES, normalized enrichment score. (c) Schematic of SCADS inhibitor screening analysis. (d) Representative data showing cell growth of control cells and 5MP1-overexpressed cells following treatment with each listed compound targeting the molecules displayed. (e) Apoptosis assay of 5MP1-overexpressed HCT116 cells. Bar graphs represent the cell distribution in late apoptosis (Annexin V-FITC+/propidium iodide [PI]+). Data represent the mean  $\pm$  SD. (\*)  $p < 0.05$ ; (\*\*)  $p < 0.01$ ; (\*\*\*)  $p < 0.001$ .
