# Supplementary material for: Novel oncogene 5MP1 reprograms c-Myc translation initiation to drive malignant phenotypes in colorectal cancer
Source: PubMed Central journal article supplement (PMC6606960; doi:10.1016/j.ebiom.2019.05.058), 2019-06-04
Supplement: mmc5.pdf [file mmc5.pdf]

**a**

(Crappé et al., 2015)  
LTM-treated HCT116

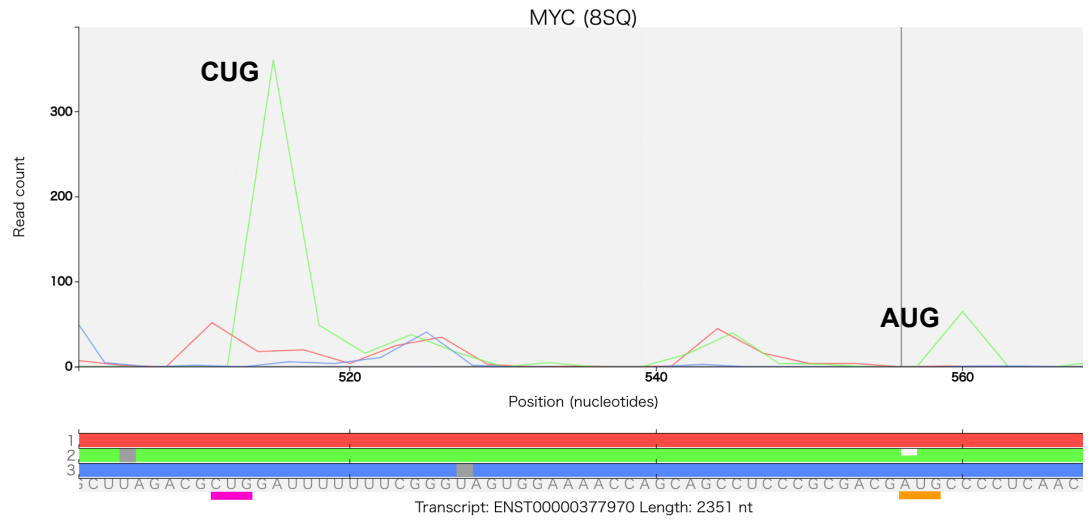**b**

(Fijałkowska et al., 2017)  
LTM-treated HCT116

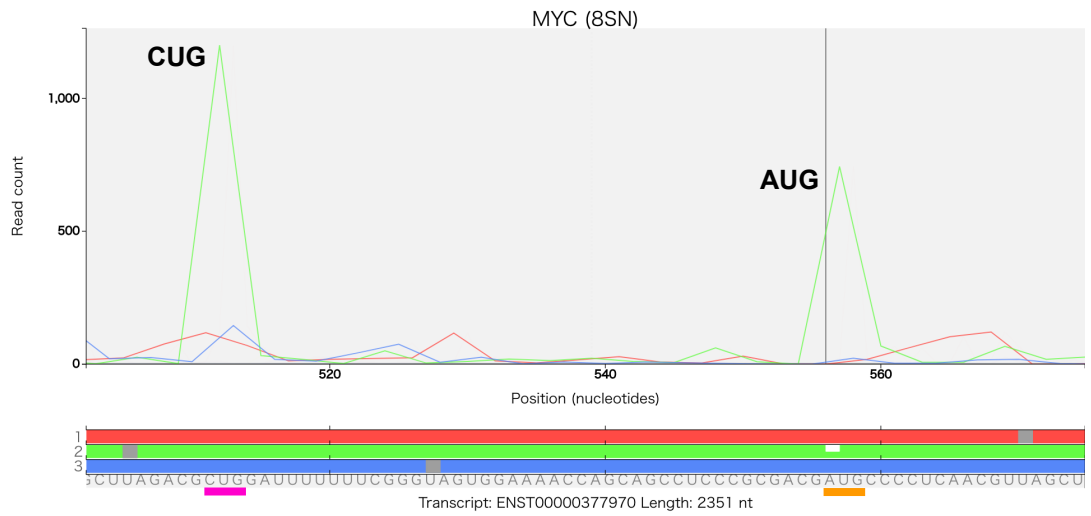**c**

(Fijałkowska et al., 2017)  
LTM-treated HCT116  
with eIF1 knock down

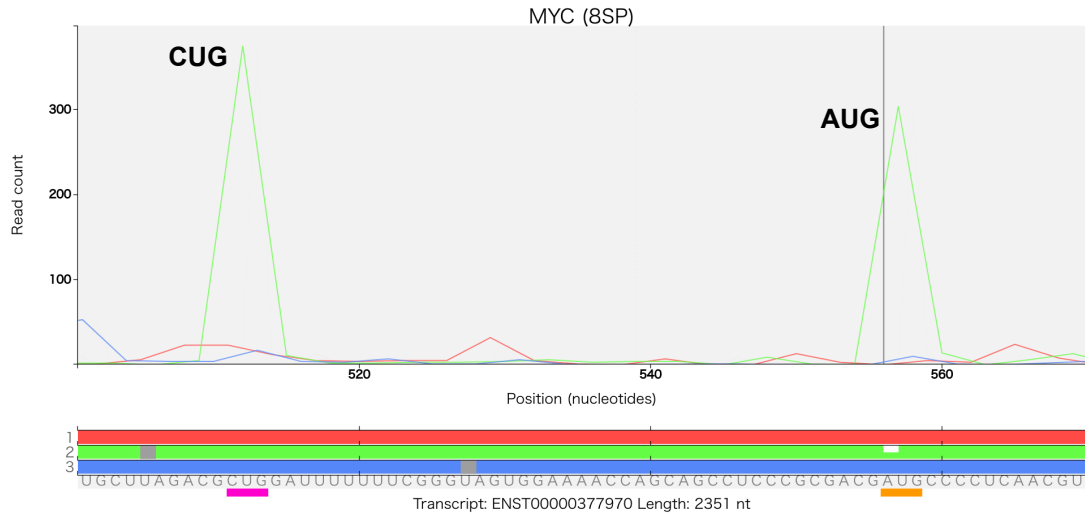

**Figure S5. Ribosome-protected profiles of c-Myc start codons in lactimidomycin (LTM)-treated HCT116 cells. Related to Figure 4.** (a-c) The ribosome occupancy at CUG and AUG start codons of the *MYC* mRNA derived from LTM-treated HCT116 cells is shown as green peaks. All data of the indicated studies was obtained from the Trips-viz website (<https://trips.ucc.ie/>).
