# Supplementary material for: Novel oncogene 5MP1 reprograms c-Myc translation initiation to drive malignant phenotypes in colorectal cancer
Source: PubMed Central journal article supplement (PMC6606960; doi:10.1016/j.ebiom.2019.05.058), 2019-06-04
Supplement: mmc6.pdf [file mmc6.pdf]

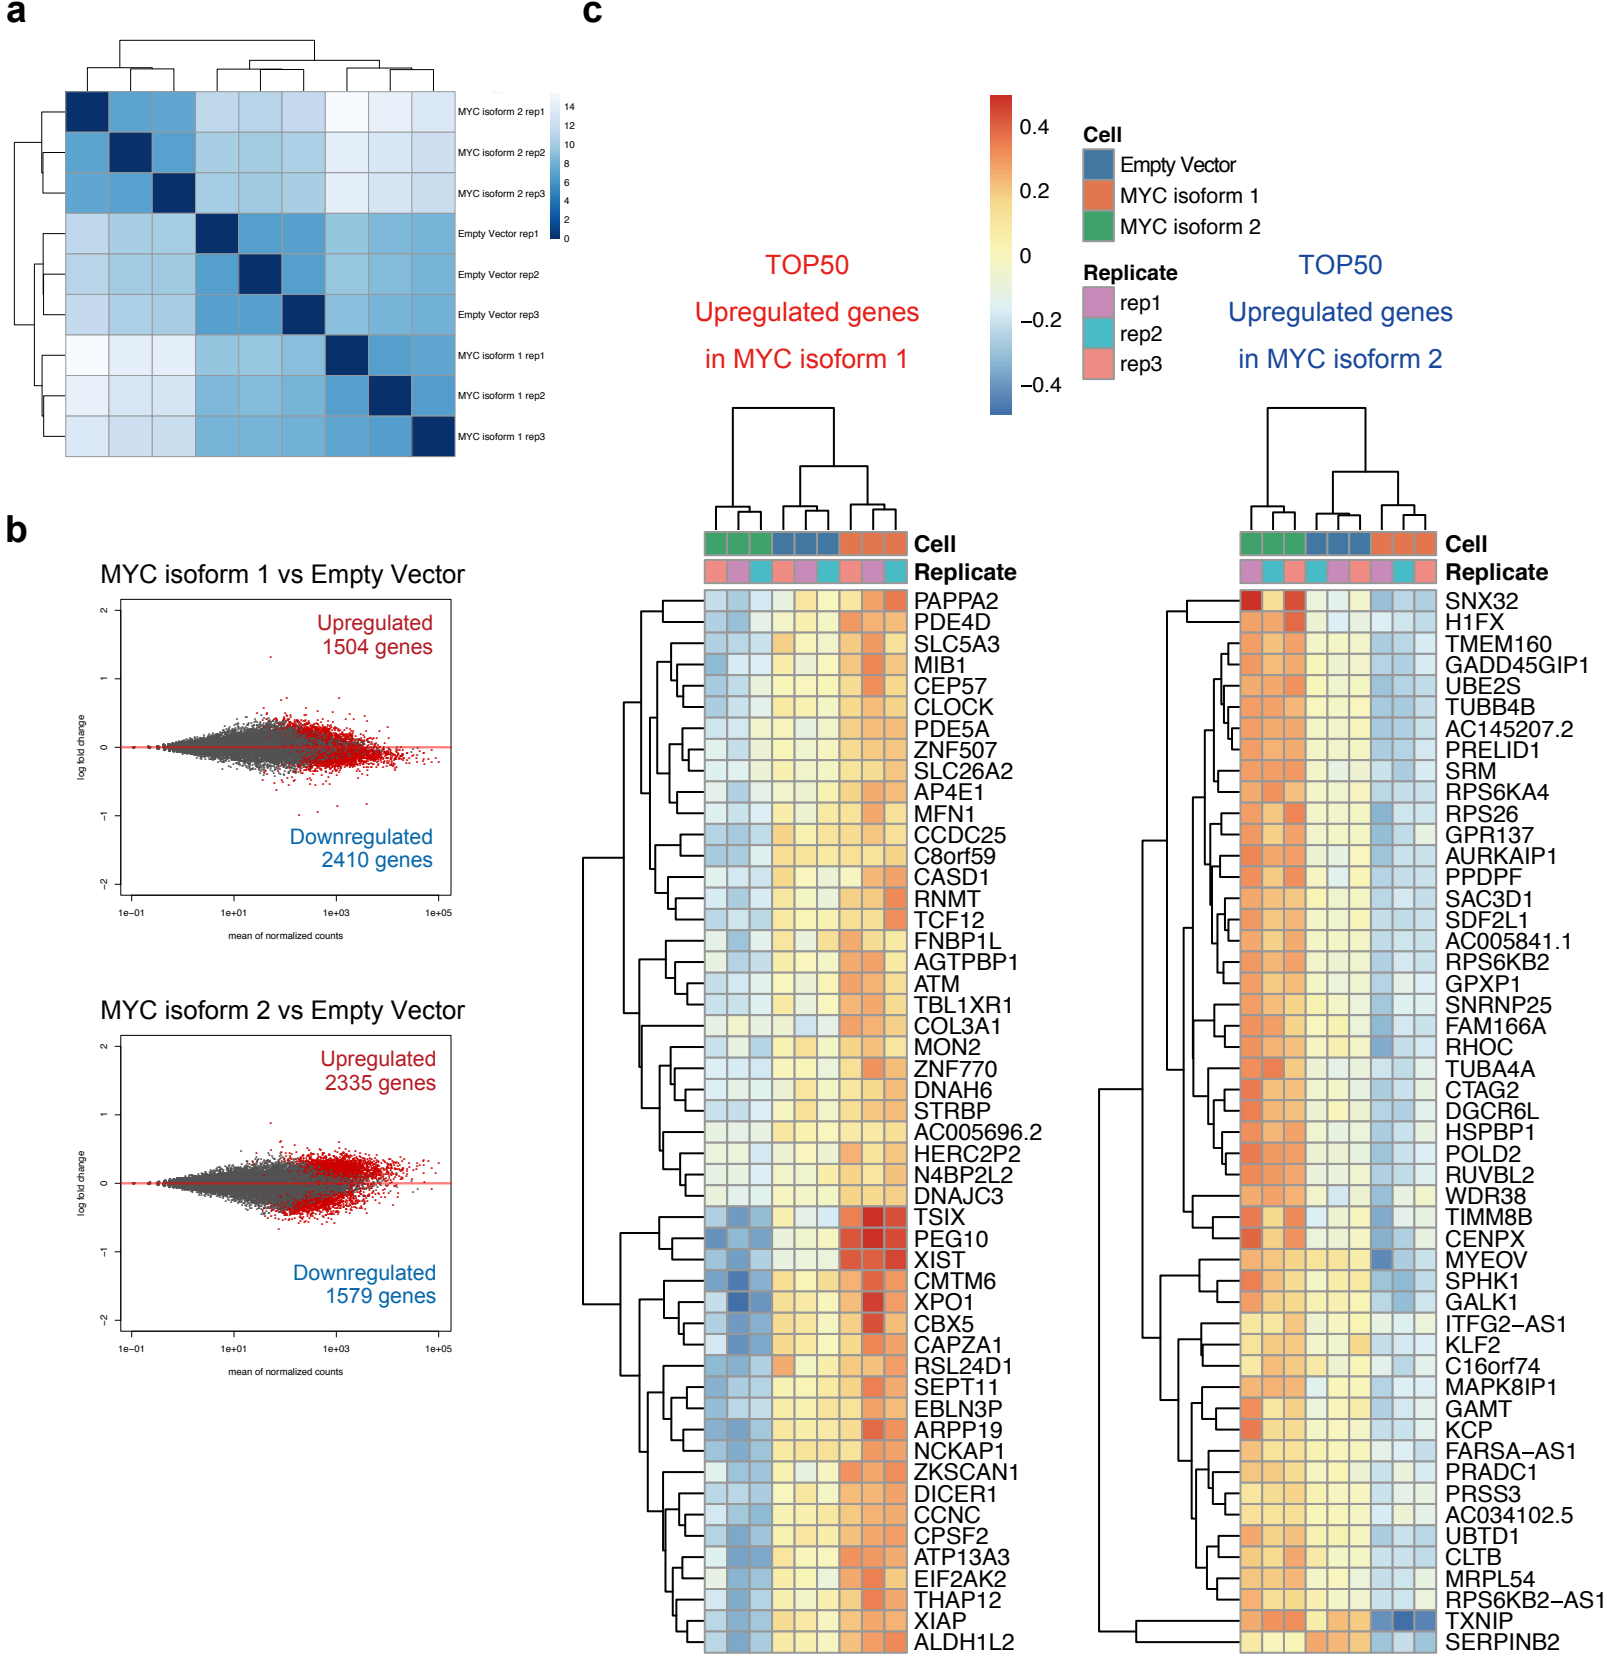

**Figure S6. Transcriptional profiling of KMST-6 cells expressing AUG- and CUG-initiated c-Myc isoforms (isoform 1 and 2). Related to Figure 5.** (a) Transcriptomic distances of the KMST-6 stable cell lines expressing the indicated lentiviral vectors. (b) MA-plot of differentially expressed genes (DEGs) between the indicated KMST-6 stable cell lines. DEGs are represented as red dots. The cutoff of DEGs was determined as  $FDR < 0.01$  (Likelihood ratio test). The numbers of significantly up- or downregulated genes are shown. (c) Hierarchical clustering of the top 50 upregulated genes ( $FDR < 0.01$ , likelihood ratio test) in isoform 1 (left) isoform 2 (right) compared to isoform 2 and isoform 1, respectively. Regularized  $\log_2$  expression values are row-mean subtracted.
