# Supplementary material for: Novel oncogene 5MP1 reprograms c-Myc translation initiation to drive malignant phenotypes in colorectal cancer
Source: PubMed Central journal article supplement (PMC6606960; doi:10.1016/j.ebiom.2019.05.058), 2019-06-04
Supplement: mmc7.pdf [file mmc7.pdf]

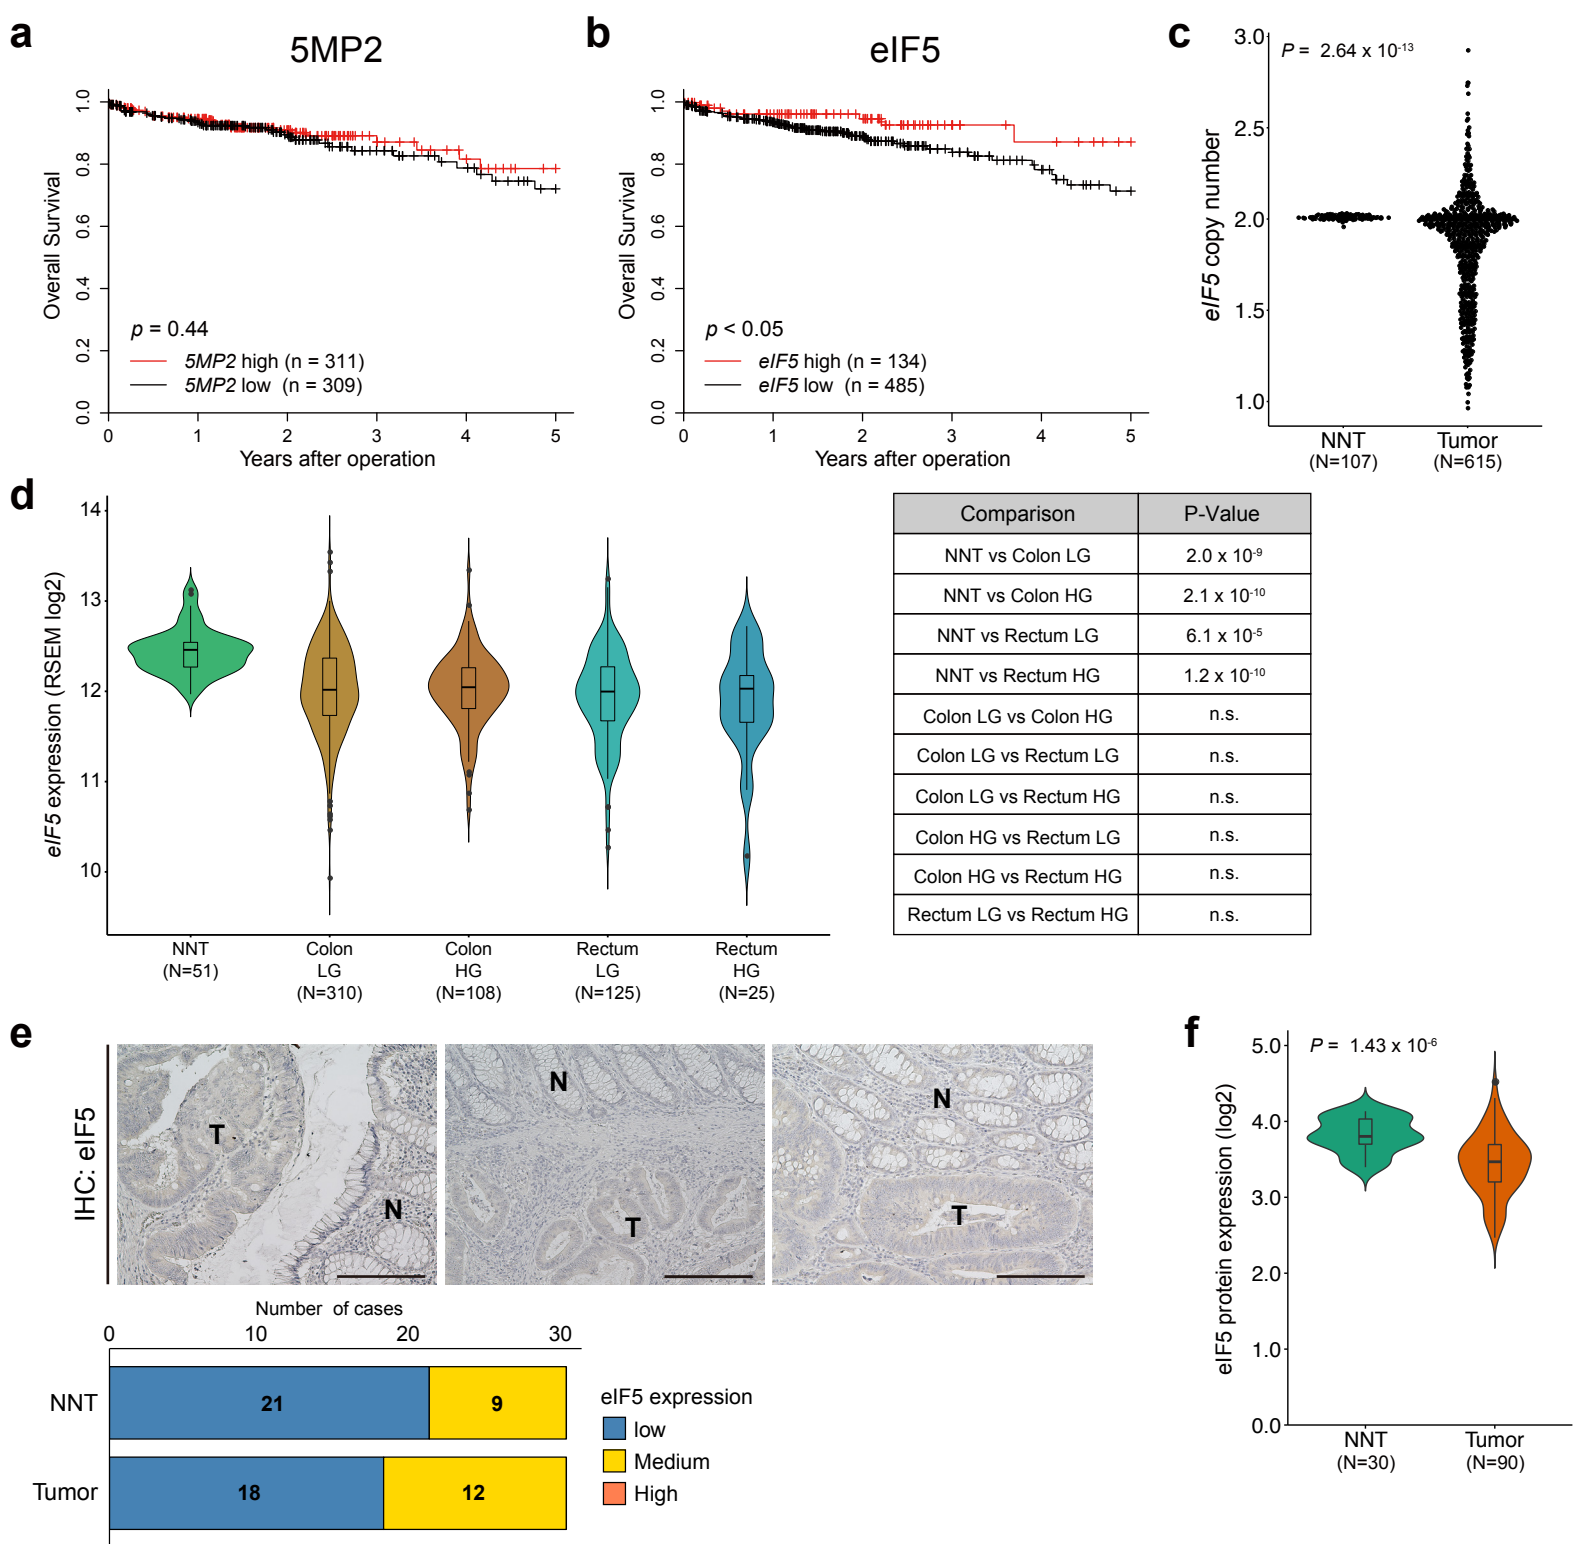

**Figure S7. Clinical relevance of 5MP2 and eIF5 expression levels in CRC. Related to Figure 6.**

(a-b) Kaplan-Meier curves for the overall survival of CRC patients in the TCGA COADREAD dataset (N = 620), classified according to the *5MP2* mRNA expression levels (a) and *eIF5* mRNA expression levels (b) in tumor tissues. P-values were calculated using the log-rank test. (c) *eIF5* copy number in CRC tissues and non-neoplastic tissues of colorectal mucosa (NNT) in TCGA dataset. P represents p-values from the two-sided Mann-Whitney U test. (d) Violin plots of *eIF5* mRNA expression levels in CRC tissues and NNT in the TCGA COADREAD dataset. P-values were calculated by pairwise comparisons using the Mann-Whitney U test with Bonferroni posttest. LG, Low Grade; HG, High Grade; n.s., not significant. (e) Representative images of immunohistochemical staining for eIF5 in CRC tissues (upper). Proportions of eIF5 levels in tumor tissues and NNT are shown using three-stage staining score (lower). T, Tumor; N, NNT; scale bars, 200 $\mu$ m. (f) Violin plots of eIF5 protein expression levels in CRC tissues and NNT in the TCGA COADREAD dataset. P represents p-values from the two-sided Mann-Whitney U test.
